# Supplementary material for: Surface fouling as a mechanism for chemotaxis in isotropic catalytic swimmers
Source: Royal Society of Chemistry journal article supplement (doi:10.1039/c7cp05102f), 2017-01-01
Supplement: c7cp05102f1.pdf [file c7cp05102f1.pdf]

# Surface fouling as a mechanism for chemotaxis in isotropic catalytic swimmers

Keith E. Whitener, Jr.

July 19, 2017

Chemistry Division, U. S. Naval Research Laboratory, Washington, D. C.,  
USA, 20375

## Supporting information

### 1 Linear fuel gradient

To model a fuel gradient linearly increasing in the  $\hat{z}$  direction, we substitute  $C_F = D_F r_0 \cos \theta + C_{F,0}$  into equations 11 and 12 in the main paper. Breaking  $\hat{r}$  into its Cartesian components, but retaining the spherical angles as integration variables for the sake of symmetry, we get:

$$\begin{aligned} \vec{v}_{tot} = & -ak_P K_F r_0^2 \left[ \hat{x} \int_0^{2\pi} \int_0^\pi \frac{\sin^2 \theta \cos \varphi (D_F r_0 \cos \theta + C_{F,0}) d\theta d\varphi}{1 + K_F (D_F r_0 \cos \theta + C_{F,0})} \right. \\ & + \hat{y} \int_0^{2\pi} \int_0^\pi \frac{\sin^2 \theta \sin \varphi (D_F r_0 \cos \theta + C_{F,0}) d\theta d\varphi}{1 + K_F (D_F r_0 \cos \theta + C_{F,0})} \\ & \left. + \hat{z} \int_0^{2\pi} \int_0^\pi \frac{\sin \theta \cos \theta (D_F r_0 \cos \theta + C_{F,0}) d\theta d\varphi}{1 + K_F (D_F r_0 \cos \theta + C_{F,0})} \right] \end{aligned} \quad (1)$$

For the  $\hat{x}$  and  $\hat{y}$  components, the only azimuthally dependent terms are  $\cos \varphi d\varphi$  and  $\sin \varphi d\varphi$ , both of which disappear when integrated from 0 to  $2\pi$ . Thus, the total velocity is directed solely along the  $\hat{z}$  direction, as expected. Performing the integration gives us the result:

$$\begin{aligned} \vec{v}_{tot} = & \hat{z} \frac{2\pi ak_P}{D_F^2 K_F^2} \left[ (C_{F,0} K_F + 1) \ln \left( \frac{C_{F,0} K_F + 1 - D_F K_F r_0}{C_{F,0} K_F + 1 + D_F K_F r_0} \right) \right. \\ & \left. + 2D_F K_F r_0 \right] \end{aligned} \quad (2)$$

We first notice that the argument of the logarithm is negative semidefinite where  $C_{F,0}K_F + 1 \leq D_F K_F r_0$ . There is a singularity where the equality holds. This is because at some point, as the radius  $r_0$  of the particle increases, a portion of the particle's surface will be in a negative concentration region. This occurs because the concentration gradient is linear and therefore the range of concentration is not bounded by zero. Since a negative concentration is unphysical, we ignore situations where  $C_{F,0}K_F + 1 \leq D_F K_F r_0$ . We next show that

$$(C_{F,0}K_F + 1) \ln \left( \frac{C_{F,0}K_F + 1 - D_F K_F r_0}{C_{F,0}K_F + 1 + D_F K_F r_0} \right) + 2D_F K_F r_0 < 0 \quad (3)$$

for all  $C_{F,0}K_F + 1 > D_F K_F r_0$ . To do this, we note that  $C_{F,0}$ ,  $K_F$ ,  $D_F$ , and  $r_0$  are all positive constants, so we can write the relation:

$$C_{F,0}K_F + 1 = s(2D_F K_F r_0) \quad (4)$$

where  $s > 1/2$ . This allows us to rewrite the condition in equation 3 above as

$$\ln \left( \frac{2s + 1}{2s - 1} \right) > \frac{1}{s} \quad (5)$$

for all  $s > 1/2$ . We can see that this condition is always true by noting that the logarithm can be rewritten as an inverse hyperbolic cotangent and expanded in a series:

$$\ln \left( \frac{2s + 1}{2s - 1} \right) = 2 \coth^{-1}(2s) = \frac{1}{s} + \frac{2}{3(2s)^3} + \frac{2}{5(2s)^5} + \dots > \frac{1}{s} \quad (6)$$

for all  $s > 1/2$ . Thus, the condition in equation 3 above is fulfilled and velocity is constant and negative along the  $\hat{z}$  direction.

## 2 Linear foulant gradient

Letting  $C_T = D_T r_0 \cos \theta + C_{T,0}$  and performing the integration in equation 12 in the main paper:

$$\begin{aligned} \vec{v}_{tot} = & -ak_P K_F C_F r_0^2 \left[ \hat{x} \int_0^{2\pi} \int_0^\pi \frac{\sin^2 \theta \cos \varphi d\theta d\varphi}{1 + K_F C_F + K_T (D_T r_0 \cos \theta + C_{T,0})} \right. \\ & + \hat{y} \int_0^{2\pi} \int_0^\pi \frac{\sin^2 \theta \sin \varphi d\theta d\varphi}{1 + K_F C_F + K_T (D_T r_0 \cos \theta + C_{T,0})} \\ & \left. + \hat{z} \int_0^{2\pi} \int_0^\pi \frac{\sin \theta \cos \theta d\theta d\varphi}{1 + K_F C_F + K_T (D_T r_0 \cos \theta + C_{T,0})} \right] \end{aligned} \quad (7)$$

Letting  $K_0 \equiv 1 + K_F C_F + K_T C_{T,0}$ , we arrive at:

$$\vec{v}_{tot} = \hat{z} \frac{2\pi ak_P K_F C_F}{K_T^2 D_T^2} K_0 [\ln(K_0 + K_T D_T r_0) - \ln(K_0 - K_T D_T r_0)] \quad (8)$$

and this expression is clearly constant and positive along the  $\hat{z}$  direction. We note briefly the singularity at  $K_0 = K_T D_T r_0$  which arises for the same reason as in the case of linear fuel gradient; that is, a portion of the particle's surface lies in an unphysical "negative concentration" region. To avoid this problem, we only consider the case where  $K_0 > K_T D_T r_0$ .

Expanding the logarithmic term in  $r_0$  gives:

$$\ln \left( \frac{K_0 + K_T D_T r_0}{K_0 - K_T D_T r_0} \right) = \frac{2K_T D_T r_0}{K_0} + \frac{2K_T^3 D_T^3 r_0^3}{3K_0^3} + \dots \quad (9)$$

demonstrating that the particle velocity is proportional to its radius.

### 3 Point source foulant gradient

The relevant integral is:

$$\vec{v}_{tot} = -\hat{z} 2\pi r_0^2 a k_P K_F C_F \int_0^\pi \frac{\sin \theta \cos \theta d\theta}{A + \left( \frac{B}{\sqrt{r_T^2 - 2r_T r_0 \cos \theta + r_0^2}} \right)} \quad (10)$$

where  $A = 1 + K_F C_F$ ,  $B = K_T C_1$ ,  $r_0$  is the particle radius, and  $r_T$  is the distance of the center of the particle from the point source. The solution to this integral has a closed form expression given by:

$$\vec{v}_{tot} = \hat{z} \frac{\pi a k_P K_F C_F}{3A^5 r_T^2} \left[ 4A^3 B r_0^3 + 6A^2 B^2 r_T r_0 - 6AB^3 r_0 + (3B^4 - 3A^2 B^2 (r_T^2 + r_0^2)) \ln \left( \frac{B + A(r_T + r_0)}{B + A(r_T - r_0)} \right) \right] \quad (11)$$

It is not at all obvious from this equation that the velocity is nonnegative for all values of  $r_T$ . To examine the general behavior of the function, we pull a factor of  $1/3A^4 r_T^2$  inside the bracket in equation 11 above to get the following expression:

$$\begin{aligned} & \frac{4r_0}{3} \left( \frac{B}{A} \right) \left( \frac{r_0}{r_T} \right)^2 + 2 \left( \frac{B}{A} \right)^2 \left( \frac{r_0}{r_T} \right) - \frac{2}{r_0} \left( \frac{B}{A} \right)^3 \left( \frac{r_0}{r_T} \right)^2 \\ & + \frac{1}{r_0^2} \left( \frac{B}{A} \right)^4 \left( \frac{r_0}{r_T} \right)^2 \ln \left[ \frac{\frac{B}{A} + r_T + r_0}{\frac{B}{A} + r_T - r_0} \right] \\ & - \left( \frac{B}{A} \right)^2 \ln \left[ \frac{\frac{B}{A} + r_T + r_0}{\frac{B}{A} + r_T - r_0} \right] \\ & - \left( \frac{B}{A} \right)^2 \left( \frac{r_0}{r_T} \right)^2 \ln \left[ \frac{\frac{B}{A} + r_T + r_0}{\frac{B}{A} + r_T - r_0} \right] \end{aligned} \quad (12)$$

A dimensional analysis of the velocity surface integral shows that  $B/A$  has units of distance. This means that  $B/A$  and  $r_0$  are related by a unitless number,  $\sigma$ . We evaluate the above equation for  $B/A = \sigma r_0$  and we let  $r_0/r_T = \rho$ , noting that the domain of  $\rho$  is  $0 < \rho < 1$  and the domain of  $\sigma$  is  $0 < \sigma < \infty$ . We obtain the following expression after dividing by  $2\sigma r_0^2$  and converting the logarithms to inverse hyperbolic cotangents:

$$f(\sigma, \rho) = \frac{2}{3}\rho^2 + \sigma\rho + \sigma^3\rho^2 \coth^{-1}\left(\sigma + \frac{1}{\rho}\right) - \sigma^2\rho^2 - (1 + \rho^2)\sigma \coth^{-1}\left(\sigma + \frac{1}{\rho}\right) \quad (13)$$

We show that  $f(\sigma, \rho) > 0$  everywhere, which is equivalent to showing that velocity is always positive along the  $\hat{z}$  axis, in the direction of the source. To do so, we first substitute  $x = \sigma + 1/\rho$ , noting that the domain of  $x$  is  $1 < x < \infty$ , and we rewrite the inverse hyperbolic cotangents as a series to get:

$$f(x, \rho) = \frac{2}{3}\rho^2 + 3x\rho - 2 + x^2\rho^2 + (x^3\rho^2 + 2x + \rho - 3x^2\rho - x\rho^2) \sum_{n=0}^{\infty} \frac{1}{(2n+1)x^{2n+1}} \quad (14)$$

Through straightforward, albeit tedious, algebraic manipulation, we can recast this equation in the following form:

$$f(x, \rho) = \sum_{n=0}^{\infty} \left[ \frac{4n+10-2\rho^2}{(2n+3)(2n+5)x^{2n+2}} - \frac{4n\rho+4\rho}{(2n+3)(2n+5)x^{2n+3}} \right] \quad (15)$$

Since  $0 < \rho < 1$ , both terms in the sum are positive. Since  $x > 1$ , the series converges absolutely and the difference between the terms (and therefore the total function  $f(x, \rho)$ ) will be positive if:

$$4n+10-2\rho^2 > 4n\rho+4\rho \quad (16)$$

or equivalently:

$$4n(1-\rho) + 2(5-2\rho-\rho^2) > 0 \quad (17)$$

Since  $0 < \rho < 1$ , this expression is always true. Therefore, the velocity is always positive along the  $\hat{z}$  axis in the direction of the foulant source. The final expression for velocity is:

$$\vec{v}_{tot} = \hat{z} \frac{2\pi r_0 a k_P K_F C_F B}{A^2} f(x, \rho) \quad (18)$$

The admittedly exhaustive analysis of the velocity presented above is necessary in light of two facts: a) the point source gradient is likely to be useful in a realistic modeling scenario, and b) the solution to this problem given by equations 11-13 above is extremely numerically unstable for large  $\sigma$ . The instability comes from the fact that a calculation of  $f(\sigma, \rho)$  from equation 13 is dominated by the difference:

$$\sigma^3 \rho^2 \coth^{-1} \left( \sigma + \frac{1}{\rho} \right) - \sigma^2 \rho^2 \approx (\sigma + \epsilon)^2 - \sigma^2 \quad (19)$$

From the series expression in equation 15 above, we see that this difference ends up being  $O(1/\sigma^2)$ , and such a small difference of large numbers leads to a significant amount of rounding error at large values of  $\sigma$ .

Equation 15 above gives us one more important insight: the leading term of the series is proportional to  $1/r_T^2$ .
